# Supplementary material for: The Effects of Alcohol Consumption on Recovery Following Resistance Exercise: A Systematic Review
Source: PubMed Central journal article supplement (PMC7739274; doi:10.3390/jfmk4030041), 2019-06-26
Supplement: jfmk-04-00041-s001.pdf [file jfmk-04-00041-s001.pdf]

**Researcher One**

| <b>Author</b>         | <b>year</b> | <b>Reporting<br/>(_/11)</b> | <b>External Validity<br/>(_/3)</b> | <b>Internal Validity<br/>– Confounding (_/7)</b> | <b>Internal Validity<br/>– Bias (_/6)</b> | <b>Power (_/5)</b> | <b>Total score<br/>(_/32)</b> |
|-----------------------|-------------|-----------------------------|------------------------------------|--------------------------------------------------|-------------------------------------------|--------------------|-------------------------------|
| <b>Original study</b> |             |                             |                                    |                                                  |                                           |                    |                               |
| Barnes et al [1]      | 2010        | 7                           | 0                                  | 4                                                | 0                                         | 4                  | 15                            |
| Barnes et al [2]      | 2010        | 7                           | 0                                  | 4                                                | 1                                         | 4                  | 16                            |
| Barnes et al [3]      | 2012        | 8                           | 0                                  | 5                                                | 0                                         | 4                  | 17                            |
| Clarkson et al [4]    | 1990        | 5                           | 0                                  | 4                                                | 0                                         | 3                  | 12                            |
| Haugvad et al [5]     | 2014        | 7                           | 1                                  | 4                                                | 2                                         | 5                  | 19                            |
| Levitt et al [6]      | 2017        | 6                           | 0                                  | 4                                                | 4                                         | 5                  | 19                            |
| Levitt et al [7]      | 2018        | 8                           | 0                                  | 3                                                | 1                                         | 4                  | 16                            |
| McLeay et al [8]      | 2017        | 9                           | 0                                  | 3                                                | 2                                         | 4                  | 18                            |
| Murphy et al [9]      | 2013        | 7                           | 0                                  | 4                                                | 3                                         | 4                  | 18                            |
| Parr et al [10]       | 2014        | 7                           | 0                                  | 4                                                | 2                                         | 5                  | 18                            |
| Poulsen et al [11]    | 2007        | 7                           | 0                                  | 6                                                | 0                                         | 5                  | 18                            |
| Vingreen et al [12]   | 2013        | 6                           | 0                                  | 5                                                | 2                                         | 5                  | 18                            |

**Researcher Two**

| <b>Author</b>         | <b>year</b> | <b>Reporting<br/>(_/11)</b> | <b>External Validity<br/>(_/3)</b> | <b>Internal Validity<br/>– Confounding (_/7)</b> | <b>Internal Validity<br/>– Bias (_/6)</b> | <b>Power (_/5)</b> | <b>Total score<br/>(_/32)</b> |
|-----------------------|-------------|-----------------------------|------------------------------------|--------------------------------------------------|-------------------------------------------|--------------------|-------------------------------|
| <b>Original study</b> |             |                             |                                    |                                                  |                                           |                    |                               |
| Barnes et al [1]      | 2010        | 9                           | 0                                  | 4                                                | 3                                         | 3                  | 19                            |
| Barnes et al [2]      | 2010        | 8                           | 1                                  | 3                                                | 4                                         | 4                  | 20                            |
| Barnes et al [3]      | 2012        | 8                           | 0                                  | 4                                                | 4                                         | 3                  | 19                            |
| Clarkson et al [4]    | 1990        | 6                           | 0                                  | 4                                                | 2                                         | 2                  | 14                            |
| Haugvad et al [5]     | 2014        | 11                          | 2                                  | 3                                                | 4                                         | 5                  | 25                            |
| Levitt et al [6]      | 2017        | 8                           | 2                                  | 4                                                | 6                                         | 4                  | 24                            |
| Levitt et al [7]      | 2018        | 9                           | 3                                  | 4                                                | 4                                         | 4                  | 24                            |
| McLeay et al [8]      | 2017        | 8                           | 0                                  | 5                                                | 5                                         | 4                  | 22                            |
| Murphy et al [9]      | 2013        | 7                           | 0                                  | 4                                                | 3                                         | 4                  | 18                            |
| Parr et al [10]       | 2014        | 9                           | 0                                  | 5                                                | 5                                         | 4                  | 23                            |
| Poulsen et al [11]    | 2007        | 9                           | 0                                  | 6                                                | 5                                         | 4                  | 24                            |
| Vingreen et al [12]   | 2013        | 9                           | 1                                  | 7                                                | 6                                         | 5                  | 28                            |

| Study                             | High quality (23-32) | Moderate quality (19-22) | Lower quality (16-18) | Poor quality (<14) |
|-----------------------------------|----------------------|--------------------------|-----------------------|--------------------|
| Barnes et al [1] <sup>26</sup>    |                      |                          | 17                    |                    |
| Barnes et al [2] <sup>17</sup>    |                      |                          | 18                    |                    |
| Barnes et al [3] <sup>18</sup>    |                      |                          | 18                    |                    |
| Clarkson et al [4] <sup>19</sup>  |                      |                          |                       | 13                 |
| Haugvad et al [5] <sup>20</sup>   |                      | 22                       |                       |                    |
| Levitt et al [6] <sup>21</sup>    |                      | 22                       |                       |                    |
| Levitt et al [7] <sup>27</sup>    |                      | 20                       |                       |                    |
| McLeay et al [8] <sup>22</sup>    |                      | 20                       |                       |                    |
| Murphy et al [9] <sup>23</sup>    | 23                   |                          |                       |                    |
| Parr et al [10] <sup>9</sup>      |                      | 21                       |                       |                    |
| Poulsen et al [11] <sup>24</sup>  |                      | 21                       |                       |                    |
| Vingreen et al [12] <sup>25</sup> | 25                   |                          |                       |                    |

## References

1. Barnes, M.J., T. Mundel, and S.R. Stannard, Post-exercise alcohol ingestion exacerbates eccentric-exercise induced losses in performance. *Eur J Appl Physiol* **2010**, *108*, 1009–1014.
2. Barnes, M.J.; Mundel, T.; Stannard, S.R. Acute alcohol consumption aggravates the decline in muscle performance following strenuous eccentric exercise. *J. Sci Med. Sport* **2010**, *13*, 189–193.
3. Barnes, M.J.; Mundel, T.; Stannard, S.R. The effects of acute alcohol consumption on recovery from a simulated rugby match. *J. Sports Sci* **2012**, *30*, 295–304.
4. Clarkson, P.M.; Reischman, F. The effect of ethanol on exercise-induced muscle damage. *J. Stud. Alcohol* **1990**, *51*, 19-23.
5. Haugvad, A., et al. Ethanol Does Not Delay Muscle Recovery, but Decreases the Testosterone: Cortisol Ratio. *Med. Sci Sports Exerc.* **2014**, *46*, 2175–2183.
6. Levitt, D.E.; Hiu-Ying, L.; Duplanty, A.A.; McFarlin, B.K.; Hill, D.W.; Vingreen, J.L. Effect of alcohol after muscle-damaging resistance exercise on muscular performance recovery and inflammatory capacity in women. *Eur. J. Appl. Physiol.* **2017**, *117*, 1195–1206.
7. Levitt, D.E.; Idemudia, N.O.; Cregar, C.M.; Duplanty, A.A.; Hill, D.W.; Vingreen, J.L. Alcohol after Resistance Exercise Does not Affect Muscle Power Recovery. *J. Strength Cond. Res.* 2018, DOI: 10.1519/JSC.0000000000002455.
8. McLeay, Y.; Stannard, S.R.; Mundel, L.; Foskett, A.; Barnes, M. Effect of Alcohol Consumption on Recovery From Eccentric Exercise Induced Muscle Damage in Females. *Int. J. Sport. Nutr. Exerc. Metab.* **2017**, *27*, 115–121.
9. Murphy, A.P.; Snape, A.E.; Minnett, G.M.; Skein, M.; Duffield, R. The effect of post-match alcohol ingestion on recovery from competitive rugby league matches. *J. Strength Cond. Res.* **2013**, *27*, 1304–1312.
10. Parr, E.B.; Camera, D.M.; Areta, J. L.; Burke, L.M.; Phillips, S.M.; Hawley, J.A.; Coffey, V.G. Alcohol ingestion impairs maximal post-exercise rates of myofibrillar protein synthesis following a single bout of concurrent training. *PLoS ONE* 2014, *9*, e88384.
11. Poulsen, M.B.; Jakobsen, J. Aagaard, N.K.; Andersen, H.; Motor performance during and following acute alcohol intoxication in healthy non-alcoholic subjects. *Eur. J. Appl. Physiol.* **2007**, *101*, 513–523.
12. Vingreen, J.L.; Hill, D.W.; Buddhadev, H.; Duplanty, A. Postresistance exercise ethanol ingestion and acute testosterone bioavailability. *Med. Sci Sports Exerc* **2013**, *45*, 1825–1832.
